# Supplementary material
Source: PubMed Central journal article supplement (PMC5016234)
Supplement: NIHMS801586-supplement-2.pdf [file NIHMS801586-supplement-2.pdf]

### Supplemental Tables

| Disassemblase    | +0AA                                   | +10AA                                     | +25AA                                        |
|------------------|----------------------------------------|-------------------------------------------|----------------------------------------------|
| Hsc70            | $0.094\text{s}^{-1}$                   | $0.053\text{s}^{-1}$                      | $0.026\text{s}^{-1}$                         |
| Hsc70 $\Delta$ C | $0.051\text{s}^{-1}$                   | $0.0078\text{s}^{-1}$                     | $0.00080\text{s}^{-1}$                       |
| Anti-Flag Fab    | $0.10\text{s}^{-1}; 0.02\text{s}^{-1}$ | $0.014\text{s}^{-1}; 0.0022\text{s}^{-1}$ | $0.00049\text{s}^{-1}; 0.00027\text{s}^{-1}$ |

*Supplemental table 1: Cage disassembly rates calculated for reactions carried out with  $2\mu\text{M}$  of the indicated proteins, and with the binding sites for these proteins placed at the WT (+0AA) position or shifted C-terminal by 10 or 25 AA. For the FLAG-Fab reactions 2 values are given depending on whether the final scattering intensity during data fitting was allowed to vary or fixed (2nd value) at 20% of the starting value.*

| Figure# | Panel | ReactionCondition              | n                                 |    |
|---------|-------|--------------------------------|-----------------------------------|----|
|         | 2     | A_D                            | 4uM 70 pH 6.8 OAA Cages           | 45 |
| --      | --    | --                             | 2uM 70 pH 6.8 OAA Cages           | 20 |
| --      | --    | --                             | 1uM 70 pH 6.8 OAA Cages           | 16 |
| --      | --    | --                             | 0.5uM 70 pH 6.8 OAA Cages         | 6  |
| --      | --    | --                             | 0.4uM 70 pH 6.8 OAA Cages         | 5  |
| --      | --    | --                             | 0.2uM 70 pH 6.8 OAA Cages         | 6  |
| --      | --    | --                             | 0.1uM 70 pH 6.8 OAA Cages         | 9  |
| --      | B_E   | 4uM 70 pH 6.8 10AA Cages       | 12                                |    |
| --      | --    | --                             | 2uM 70 pH 6.8 10AA Cages          | 6  |
| --      | --    | --                             | 1uM 70 pH 6.8 10AA Cages          | 5  |
| --      | --    | --                             | 0.5uM 70 pH 6.8 10AA Cages        | 8  |
| --      | --    | --                             | 0.25uM 70 pH 6.8 10AA Cages       | 3  |
| --      | --    | --                             | 0.1uM 70 pH 6.8 10AA Cages        | 5  |
| --      | C_F   | 8uM 70 pH 6.8 25AA Cages       | 6                                 |    |
| --      | --    | --                             | 4uM 70 pH 6.8 25AA Cages          | 26 |
| --      | --    | --                             | 2uM 70 pH 6.8 25AA Cages          | 16 |
| --      | --    | --                             | 1uM 70 pH 6.8 25AA Cages          | 17 |
| --      | --    | --                             | 0.5uM 70 pH 6.8 25AA Cages        | 7  |
| --      | --    | --                             | 0.25uM 70 pH 6.8 25AA Cages       | 5  |
| --      | --    | --                             | 0.1uM 70 pH 6.8 25AA Cages        | 3  |
| --      | G     | 2uM 70DelC pH 6.8 OAA Cages    | 8                                 |    |
| --      | --    | --                             | 1uM 70DelC pH 6.8 OAA Cages       | 12 |
| --      | --    | --                             | 0.5uM 70DelC pH 6.8 OAA Cages     | 10 |
| --      | --    | --                             | 0.25uM 70DelC pH 6.8 OAA Cages    | 9  |
| --      | H     | 2uM 70DelC pH 6.8 10AA Cages   | 11                                |    |
| --      | --    | --                             | 1uM 70DelC pH 6.8 10AA Cages      | 11 |
| --      | --    | --                             | 0.5uM 70DelC pH 6.8 10AA Cages    | 4  |
| --      | --    | --                             | 0.25uM 70DelC pH 6.8 10AA Cages   | 5  |
| --      | I     | 2uM 70DelC pH 6.8 25AA Cages   | 4                                 |    |
| --      | --    | --                             | 1uM 70DelC pH 6.8 25AA Cages      | 6  |
| --      | --    | --                             | 0.5uM 70DelC pH 6.8 25AA Cages    | 8  |
| --      | --    | --                             | 0.25uM 70DelC pH 6.8 25AA Cages   | 8  |
| --      | J     | 2uM Fab pH 6.8 OAA FLAG Cages  | 8                                 |    |
| --      | --    | --                             | 1uM Fab pH 6.8 OAA FLAG Cages     | 6  |
| --      | --    | --                             | 0.5uM Fab pH 6.8 OAA FLAG Cages   | 6  |
| --      | --    | --                             | 0.25uM Fab pH 6.8 OAA FLAG Cages  | 6  |
| --      | K     | 2uM Fab pH 6.8 10AA FLAG Cages | 7                                 |    |
| --      | --    | --                             | 1uM Fab pH 6.8 10AA FLAG Cages    | 6  |
| --      | --    | --                             | 0.5uM Fab pH 6.8 10AA FLAG Cages  | 6  |
| --      | --    | --                             | 0.25uM Fab pH 6.8 10AA FLAG Cages | 5  |
| --      | L     | 2uM Fab pH 6.8 25AA FLAG Cages | 7                                 |    |
| --      | --    | --                             | 1uM Fab pH 6.8 25AA FLAG Cages    | 6  |
| --      | --    | --                             | 0.5uM Fab pH 6.8 25AA FLAG Cages  | 6  |
| --      | --    | --                             | 0.25uM Fab pH 6.8 25AA FLAG Cages | 5  |
|         | 3     | A                              | 2uM70 pH 6 OAA Cages              | 8  |
| --      | --    | --                             | 1uM70 pH 6 OAA Cages              | 6  |

|    |    |                                   |    |
|----|----|-----------------------------------|----|
| -- | -- | 0.5uM70 pH 6 0AA Cages            | 7  |
| -- | -- | 0.25uM70 pH 6 0AA Cages           | 7  |
| -- | B  | 2uM70 pH 6 10AA Cages             | 6  |
| -- | -- | 1uM70 pH 6 10AA Cages             | 10 |
| -- | -- | 0.5uM70 pH 6 10AA Cages           | 5  |
| -- | -- | 0.25uM70 pH 6 10AA Cages          | 6  |
| -- | C  | 2uM70 pH 6 25AA Cages             | 14 |
| -- | -- | 1uM70 pH 6 25AA Cages             | 19 |
| -- | -- | 0.5uM70 pH 6 25AA Cages           | 6  |
| -- | -- | 0.25uM70 pH 6 25AA Cages          | 8  |
| -- | D  | 2uM70 pH 6 0AA FLAG-Tag Cages     | 4  |
| -- | -- | 1uM70 pH 6 0AA FLAG-Tag Cages     | 5  |
| -- | -- | 0.5uM70 pH 6 0AA FLAG-Tag Cages   | 6  |
| -- | -- | 0.25uM70 pH 6 0AA FLAG-Tag Cages  | 6  |
| -- | E  | 2uM70 pH 6 10AA FLAG-Tag Cages    | 9  |
| -- | -- | 1uM70 pH 6 10AA FLAG-Tag Cages    | 8  |
| -- | -- | 0.5uM70 pH 6 10AA FLAG-Tag Cages  | 4  |
| -- | -- | 0.25uM70 pH 6 10AA FLAG-Tag Cages | 4  |
| -- | F  | 2uM70 pH 6 25AA FLAG-Tag Cages    | 12 |
| -- | -- | 1uM70 pH 6 25AA FLAG-Tag Cages    | 8  |
| -- | -- | 0.5uM70 pH 6 25AA FLAG-Tag Cages  | 4  |
| -- | -- | 0.25uM70 pH 6 25AA FLAG-Tag Cages | 4  |
| -- | G  | 2uM70DeIC pH 6 0AA Cages          | 8  |
| -- | -- | 1uM70DeIC pH 6 0AA Cages          | 4  |
| -- | -- | 0.5uM70DeIC pH 6 0AA Cages        | 7  |
| -- | -- | 0.25uM70DeIC pH 6 0AA Cages       | 6  |
| -- | H  | 2uM70DeIC pH 6 25AA Cages         | 5  |
| -- | -- | 1uM70DeIC pH 6 25AA Cages         | 4  |
| -- | -- | 0.5uM70DeIC pH 6 25AA Cages       | 4  |
| -- | -- | 0.25uM70DeIC pH 6 25AA Cages      | 5  |
| 5  | C  | All Conditions in Panel C         | 13 |
| -- | D  | All Conditions in Panel D         | 12 |
| 6  | A  | 20nM70_0nM110 pH 6.8 0AACages     | 8  |
| -- | -- | 20nM70_100nM110 pH 6.8 0AACages   | 5  |
| -- | -- | 20nM70_300nM110 pH 6.8 0AACages   | 7  |
| -- | -- | 20nM70_900nM110 pH6.8 0AACages    | 5  |
| -- | -- | 20nM70_2700nM110 pH 6.8 0AACages  | 7  |
| -- | -- | 0nM70_2700nM110 pH 6.8 0AACages   | 4  |
| -- | B  | 250nM70_0nM110 pH 6.8 0AACages    | 4  |
| -- | -- | 250nM70_100nM110 pH 6.8 0AACages  | 5  |
| -- | -- | 250nM70_300nM110 pH 6.8 0AACages  | 5  |
| -- | -- | 250nM70_900nM110 pH6.8 0AACages   | 4  |
| -- | -- | 250nM70_2700nM110 pH 6.8 0AACages | 6  |
| -- | C  | 5uM70 pH 6 0AA Cages              | 11 |
| -- | -- | 10uM70 pH 6 0AA Cages             | 9  |
| -- | -- | 21uM70 pH 6 0AA Cages             | 8  |
| -- | -- | 42uM70 pH 6 0AA Cages             | 4  |

|    |    |                                                                    |    |
|----|----|--------------------------------------------------------------------|----|
| -- | D  | 5uM70DeIC pH 6 OAA Cages                                           | 5  |
| -- | -- | 10uM70DeIC pH 6 OAA Cages                                          | 10 |
| -- | -- | 21uM70DeIC pH 6 OAA Cages                                          | 10 |
| -- | -- | 42uM70DeIC pH 6 OAA Cages                                          | 8  |
| -- | E  | 125nMHisTag70_0nM Anti-His Fab pH 6.8 OAA Untagged Cages           | 14 |
| -- | -- | 125nMHisTag70_125nM Anti-His Fab pH 6.8 OAA Untagged Cages         | 15 |
| -- | -- | 125nMHisTag70_250nM Anti-His Fab pH 6.8 OAA Untagged Cages         | 12 |
| -- | -- | 125nMHisTag70_63nM Anti-His Fab pH 6.8 OAA Untagged Cages          | 6  |
| -- | F  | 0nMHisTag70_125nM Anti-His Fab pH 6.8 OAA Untagged Cages           | 5  |
| -- | -- | 125nMUntagged70_125nM Anti-His Fab pH 6.8 OAA UntaggedCages        | 4  |
| -- | -- | 125nMUntaggedTag70_0nM Anti-His Fab pH 6.8 OAA Nterm-His-Tag Cages | 6  |

| <b>Supplemental Table 3: AFM Measurement of Cage Size and Compressibility with Hsc70ΔC or Hsc70</b> |              |                        |                          |                           |                         |
|-----------------------------------------------------------------------------------------------------|--------------|------------------------|--------------------------|---------------------------|-------------------------|
|                                                                                                     |              | Clathrin<br>Cages only | Clathrin-Auxilin<br>Cage | Clathrin-Hsc70ΔC<br>Cages | Clathrin-Hsc70<br>Cages |
| <b>Tip Force=200 pN</b>                                                                             |              |                        |                          |                           |                         |
|                                                                                                     | # Particles  | 244                    | 167                      | 200                       | 198                     |
| Full Height                                                                                         | Mean (nm)    | 69.9                   | 70.1                     | 73.5                      | 68.3                    |
|                                                                                                     | s.d.         | 15.0                   | 14.8                     | 17.1                      | 16.2                    |
|                                                                                                     | s.d.of mean  | 1.0                    | 1.1                      | 1.2                       | 1.2                     |
|                                                                                                     | median       | 68.2                   | 69.6                     | 70.8                      | 66.7                    |
| Mean<br>Compression                                                                                 | Mean (nm)    | 8.5                    | 8.9                      | 9.9                       | 11.9                    |
|                                                                                                     | s.d.         | 2.4                    | 2.4                      | 2.7                       | 4.5                     |
|                                                                                                     | s.d. of mean | 0.15                   | 0.18                     | 0.19                      | 0.32                    |
|                                                                                                     | median       | 8.3                    | 8.5                      | 9.6                       | 10.6                    |
| Maximum<br>Compression                                                                              | Mean (nm)    | 15.6                   | 16.1                     | 19.9                      | 24                      |
|                                                                                                     | s.d.         | 3.6                    | 2.9                      | 4.4                       | 9.5                     |
|                                                                                                     | s.d. of mean | 0.23                   | 0.23                     | 0.31                      | 0.68                    |
|                                                                                                     | median       | 15.2                   | 15.9                     | 19.7                      | 22.1                    |
| <b>Tip Force=100 pN</b>                                                                             |              |                        |                          |                           |                         |
|                                                                                                     | # Particles  | ND                     | 358                      | ND                        | 522                     |
| Full Height                                                                                         | Mean (nm)    | ND                     | 80.3                     | ND                        | 78.8                    |
|                                                                                                     | s.d.         | ND                     | 16.3                     | ND                        | 20.0                    |
|                                                                                                     | s.d.of mean  | ND                     | 0.86                     | ND                        | 0.83                    |
|                                                                                                     | median       | ND                     | 77.1                     | ND                        | 72.9                    |
| Mean<br>Compression                                                                                 | Mean (nm)    | ND                     | 7.6                      | ND                        | 6.3                     |
|                                                                                                     | s.d.         | ND                     | 3.0                      | ND                        | 3.7                     |
|                                                                                                     | s.d. of mean | ND                     | 0.16                     | ND                        | 0.16                    |
|                                                                                                     | median       | ND                     | 6.9                      | ND                        | 5.5                     |
|                                                                                                     | # Particles  | ND                     | 358                      | ND                        | 522                     |
| Maximum<br>Compression                                                                              | Mean (nm)    | ND                     | 19.3                     | ND                        | 30.4                    |
|                                                                                                     | s.d.         | ND                     | 10.4                     | ND                        | 26.0                    |
|                                                                                                     | s.d. of mean | ND                     | 0.55                     | ND                        | 1.1                     |
|                                                                                                     | median       | ND                     | 17.9                     | ND                        | 19.9                    |

Mean and median values for size and mean and maximum compression of clathrin cages, cages+auxilin, cages+auxilin+Hsc70ΔC and cages+auxilin+Hsc70.
