# Supplementary material
Source: PubMed Central journal article supplement (PMC5016234)
Supplement: NIHMS801586-supplement-3.pdf [file NIHMS801586-supplement-3.pdf]

**Calculation 1** (entropic pulling prediction of the effect of moving the Hsc70 binding on disassembly rates): De los Rios and Goloubinoff computed the difference in motional entropy between having an Hsc70 bound to an extended polypeptide up against a wall (i.e., with the center of the binding site ~8 AA from the wall) vs. an Hsc70 bound to the extended polypeptide at a very large (infinite) distance from the wall to correspond to a ~3 kcal free energy difference<sup>17</sup>. In +0AA clathrin cages the center of the QLMLT site is ~10 AA away from the end of the structured tripod helices, and the free energy available from moving the Hsc70 away from this position is estimated at ~2.8 kcal. For Hsc70s bound ~20 and ~35 AA away vs. far from the wall, their model estimates the free energy differences to be ~1.3 and ~0.5 kcal, respectively. Thus moving the Hsc70 from being bound close (10AA) to the cage wall vs. 20 (+10) or 35 (+25) AA away would reduce the free energy available for driving disassembly by 1.5 and 2.3 kcal, respectively. Under standard conditions a 1.3 kcal reduction in the free energy available for overcoming a transition state energy barrier would slow a reaction by a factor of 10, so the 1.5 and 2.3 kcal reductions could correspond to  $10^{(1.6/1.3)}=10$ - and  $10^{(2.4/1.3)}=60$ -fold reductions in disassembly rates, respectively.

**Calculation 2** (osmotic pressure/force generated by an Hsc70 bound under a cage vertex): Consider an Hsc70 bound under the vertex of a clathrin triskelion via a short tether that constrains it to a volume element ~11 nm in diameter. A sphere 11 nm in diameter has a volume of  $\sim 7 \times 10^5 \text{ \AA}^3$  and, assuming the cage walls make a  $30^\circ$  angle with a line normal to the vertex, the space under the vertex would occupy ~40% of that or  $\sim 2.8 \times 10^5 \text{ \AA}^3$ , and a single Hsc70 would occupy a volume of  $8.5 \times 10^4 \text{ \AA}^3$ , corresponding to 400-450 mg/ml protein. A 450 mg/ml solution of albumin (MW 69 Kd) generates an osmotic pressure of  $\sim 5 \text{ atm}^{41}$ , corresponding to a force of  $0.5 \text{ pN/nm}^2$ . Assuming that the Hsc70 generates a similar osmotic pressure on the walls of its ‘vessel’, then the total force on the triskelia walls (whose area will equal  $3.14 \times (5.5 \text{ nm})^2 = 95 \text{ nm}^2$ ) will be  $0.5 \text{ pN/nm}^2 \times 95 \text{ nm}^2 = 40\text{-}45 \text{ pN}$ . Pushing on the cage walls normal to the vertex must be balanced by pulling on the tether, lest the situation create a *perpetuum mobile*. However, pushing forces directed horizontally would lead to a net force of  $\sim 20 \text{ pN}$  ( $40 \text{ pN} \times \sin 30^\circ$ ) on the cage walls.
