# Supplementary material
Source: PubMed Central journal article supplement (PMC5016234)
Supplement: NIHMS801586-supplement-4.pdf [file NIHMS801586-supplement-4.pdf]

**Simplefit:**

```

[task]
task = fit
data = progress
model = AHAHAH
[mechanism]
CA + T → CAT : ka
CAT → Prods : kd
[constants] ; units are “uM”, “seconds”
ka = 1 ?
kd1 = .1 ?
[responses]
CA = 20
CAT = 30 ?
Prods=4
[concentrations]
CA = .05
[progress]
directory ./AvWT
extension dat
file 2um | conc T=2
[output]
directory ./SimpleFit
[end]

```

**Rothnie et al. fit:**

```

[task]
task = fit
data = progress
model = AHAHAH
[mechanism]
CA + T → CAT : ka
CAT → CAD + Pi : kr
CAD + T → CADT : ka
CADT → CADD + Pi : kr
CADD + T → CADDT : ka
CADDT → CADDD + Pi : kr
CADDD → Prods : kd
[constants] ; units are “uM”, “seconds”
ka = 1 ?
kr= 10 ?
kd = .1 ?
[responses]
CA = 20 ?
CAT = 30 ?
CAD = 1 * CAT
CADT = 1 * CAT
CADD = 1 * CAT
CADDT = 1 * CAT
CADDD = 1 * CAT
[concentrations]
CA = .05
[progress]
directory ./AvSubWT
extension dat
file 2um | offset = 0 ? | conc CA = 0.05 ? , T=2 ?
file 1um | offset = 0 ? | conc CA = 0.05 ? , T=1
file 500nm | offset = 0 ? | conc CA = 0.05 ? , T=.5 ?
file 400nm | offset = 0 ? | conc CA = 0.05 ? , T=.4 ?
file 200nm | offset = 0 ? | conc CA = 0.05 ? , T=.2 ?
file 100nm | offset = 0 ? | conc CA = 0.05 ? , T=.1 ?
[output]
directory ./RothnieFit1

```
